# Supplementary material for: Global Distribution of Babesia Species in Questing Ticks: A Systematic Review and Meta-Analysis Based on Published Literature
Source: MDPI journal article supplement (doi:10.3390/pathogens10020230), 2021-02-19
Supplement: s1 [file s1]

**Supplementary Table S2:** Quality assessment scores for eligible studies

| Study Name [Reference No.]                  | Q1 | Q2 | Q3 | Q4 | Q5 | Q6 | Q7 | Q8 | Q9 | Overall score X/9<br>(% Score) |
|---------------------------------------------|----|----|----|----|----|----|----|----|----|--------------------------------|
| (Blaschitz et al. 2008)                     | 1  | 1  | 1  | 0  | 0  | 1  | 1  | 0  | NA | 5 (55.6)                       |
| (Reye et al. 2013)                          | 1  | 1  | 1  | 0  | 1  | 1  | 1  | 1  | NA | 7 (77.8)                       |
| (Klitgaard et al. 2019)                     | 1  | 1  | 1  | 0  | 1  | 1  | 1  | 1  | NA | 7 (77.8)                       |
| (Sormunen et al. 2020)                      | 1  | 1  | 1  | 0  | 1  | 1  | 1  | 1  | NA | 7 (77.8)                       |
| (Sormunen et al. 2018)                      | 1  | 1  | 1  | 1  | 1  | 1  | 1  | 1  | NA | 8 (88.9)                       |
| (Bonnet et al. 2013)                        | 1  | 1  | 1  | 0  | 1  | 1  | 1  | 1  | NA | 7 (66.7)                       |
| (Cotte et al. 2010)                         | 1  | 1  | 1  | 1  | 1  | 1  | 1  | 1  | NA | 8 (66.7)                       |
| (Halos et al. 2005)                         | 1  | 1  | 1  | 1  | 1  | 1  | 1  | 1  | NA | 8 (88.9)                       |
| (Jouglin et al. 2017)                       | 1  | 1  | 1  | 1  | 1  | 1  | 1  | 1  | NA | 8 (77.8)                       |
| (Lejal et al. 2019)                         | 1  | 1  | 1  | 1  | 1  | 1  | 1  | 1  | NA | 8 (88.9)                       |
| (Reis et al. 2011)                          | 1  | 1  | 1  | 1  | 1  | 1  | 1  | 1  | NA | 8 (88.9)                       |
| (Eshoo et al. 2014)                         | 1  | 1  | 1  | 0  | 1  | 1  | 1  | 1  | NA | 8 (88.9)                       |
| (Franke et al. 2010)                        | 1  | 1  | 1  | 0  | 1  | 1  | 1  | 1  | NA | 8 (88.9)                       |
| (Franke et al. 2011)                        | 1  | 1  | 1  | 0  | 1  | 1  | 1  | 1  | NA | 8 (88.9)                       |
| (Hartelt et al. 2004)                       | 1  | 1  | 1  | 1  | 1  | 1  | 1  | 1  | NA | 8 (88.9)                       |
| (Hildebrandt et al. 2010)                   | 1  | 1  | 1  | 1  | 1  | 1  | 1  | 1  | NA | 8 (88.9)                       |
| (Hildebrandt et al. 2011)                   | 1  | 1  | 1  | 1  | 1  | 1  | 1  | 1  | NA | 8 (88.9)                       |
| (Overzier, Pfister, Thiel, et al. 2013)     | 1  | 1  | 1  | 1  | 1  | 1  | 1  | 1  | NA | 8 (88.9)                       |
| (Overzier, Pfister, Herb, et al. 2013)      | 1  | 1  | 1  | 1  | 1  | 1  | 1  | 1  | NA | 8 (88.9)                       |
| (Schorn et al. 2011)                        | 1  | 1  | 1  | 1  | 1  | 1  | 1  | 1  | NA | 8 (88.9)                       |
| (Silaghi et al. 2012)                       | 1  | 1  | 1  | 1  | 1  | 1  | 1  | 1  | NA | 8 (88.9)                       |
| (Silaghi, Weis, and Pfister 2020)           | 1  | 1  | 1  | 1  | 1  | 1  | 1  | 1  | NA | 8 (88.9)                       |
| (Kohn et al. 2019)                          | 1  | 1  | 1  | 1  | 1  | 1  | 1  | 1  | NA | 8 (88.9)                       |
| (Sprong et al. 2019)                        | 1  | 1  | 1  | 0  | 1  | 1  | 0  | 1  | NA | 6 (66.7)                       |
| (Egyed et al. 2012)                         | 1  | 1  | 1  | 0  | 0  | 1  | 0  | 1  | NA | 5 (55.6)                       |
| (Hornok et al. 2016)                        | 1  | 1  | 1  | 1  | 1  | 1  | 1  | 1  | NA | 8 (88.9)                       |
| (Capelli et al. 2012)                       | 1  | 1  | 1  | 1  | 1  | 1  | 1  | 1  | NA | 8 (88.9)                       |
| (Cassini et al. 2010)                       | 1  | 1  | 1  | 0  | 0  | 1  | 1  | 1  | NA | 6 (66.7)                       |
| (Floris et al. 2009)                        | 1  | 1  | 1  | 1  | 0  | 1  | 1  | 1  | NA | 7 (77.8)                       |
| (Piccolin et al. 2006)                      | 1  | 1  | 1  | 0  | 0  | 0  | 1  | 1  | NA | 5 (55.6)                       |
| (Capligina et al. 2016)                     | 1  | 1  | 1  | 1  | 1  | 1  | 1  | 1  | NA | 8 (88.9)                       |
| (Radzijeuskaja et al. 2018)                 | 1  | 1  | 1  | 1  | 1  | 1  | 1  | 1  | NA | 8 (88.9)                       |
| (Oines et al. 2012)                         | 1  | 1  | 1  | 1  | 1  | 1  | 1  | 1  | NA | 8 (88.9)                       |
| (Radzijeuskaja, Paulauskas, and Rosef 2008) | 1  | 1  | 1  | 1  | 1  | 1  | 1  | 1  | NA | 8 (88.9)                       |
| (Žygutienė et al. 2008)                     | 1  | 1  | 1  | 1  | 0  | 1  | 1  | 1  | NA | 7 (77.8)                       |
| (Wielinga et al. 2009)                      | 1  | 1  | 1  | 1  | 0  | 1  | 1  | 1  | NA | 7 (77.8)                       |
| (Asman et al. 2015)                         | 1  | 1  | 1  | 0  | 0  | 1  | 1  | 1  | NA | 6 (66.7)                       |
| (Cieniuch, Stanczak, and Ruczaj 2009)       | 1  | 1  | 1  | 1  | 1  | 1  | 1  | 1  | NA | 8 (88.9)                       |
| (Karbowski et al. 2014)                     | 1  | 1  | 1  | 0  | 0  | 1  | 1  | 0  | NA | 5 (55.6)                       |
| (Pieniazek, Sawczuk, and Skotarczak 2006)   | 1  | 1  | 1  | 1  | 0  | 1  | 1  | 1  | NA | 7 (77.8)                       |

[illegible]

[illegible]
